# Supplementary material for: Inhaled pirfenidone solution (AP01) for IPF: a randomised, open-label, dose–response trial
Source: HighWire-hosted journal article supplement (doi:10.1136/thorax-2022-219391), 2023-03-22
Supplement: thorax-2022-219391supp005_data_supplement.pdf [file thorax-2022-219391supp005_data_supplement.pdf]

**Supplementary Table 2: Patient-reported outcome (PRO) results [mean (standard deviation)]**

|                                       | 50 mg once daily |                      |              | 100 mg twice daily |                      |              |
|---------------------------------------|------------------|----------------------|--------------|--------------------|----------------------|--------------|
|                                       | Baseline         | Change from Baseline |              | Baseline           | Change from Baseline |              |
|                                       |                  | 24 weeks             | 48 weeks     |                    | 24 weeks             | 48 weeks     |
| Patients, n                           | 46               | 40                   | 36           | 42                 | 35                   | 29           |
| <b>Leicester Cough Questionnaire</b>  |                  |                      |              |                    |                      |              |
| Total                                 | 15.74 (4.11)     | 0.22 (3.61)          | -1.28 (3.51) | 16.67 (3.44)       | -0.44 (3.11)         | -0.53 (2.84) |
| Physical                              | 5.07 (1.20)      | 0.15 (1.06)          | -0.28 (1.08) | 5.32 (1.03)        | 0.02 (0.94)          | -0.05 (0.91) |
| Psychological                         | 5.23 (1.54)      | 0.06 (1.34)          | -0.46 (1.22) | 5.63 (1.31)        | -0.22 (1.27)         | -0.20 (0.97) |
| Social                                | 5.43 (1.50)      | 0.01 (1.36)          | -0.54 (1.38) | 5.72 (1.26)        | -0.24 (1.11)         | -0.29 (1.15) |
| <b>King's Brief ILD Questionnaire</b> |                  |                      |              |                    |                      |              |
| Total                                 | 53.5 (14.0)      | -0.2 (8.1)           | -0.3 (11.4)  | 57.2 (10.9)        | 3.1 (13.2)           | 2.1 (15.5)   |
| Breathlessness and activities         | 40.0 (18.1)      | -2.4 (13.3)          | -2.3 (15.9)  | 45.0 (17.7)        | 6.3 (16.7)           | 3.8 (20.1)   |
| Chest symptoms                        | 64.8 (23.6)      | 1.2 (17.6)           | -1.0 (18.4)  | 70.1 (19.5)        | 0.7 (16.5)           | -1.0 (19.1)  |
| Psychological                         | 53.7 (20.0)      | 2.2 (13.3)           | -0.5 (15.1)  | 58.1 (15.3)        | 3.4 (19.5)           | 3.2 (22.5)   |

ILD: interstitial lung disease.
